# 1 **Planned missing data design: stronger inferences, increased research** 2 **efficiency and improved animal welfare in ecology and evolution**

3  
4 Daniel W.A. Noble<sup>1,\*</sup> and Shinichi Nakagawa<sup>1,2,\*</sup>

5  
6 <sup>1</sup> Ecology and Evolution Research Centre, School of Biological, Earth and Environmental  
7 Sciences, The University of New South Wales, Kensington NSW 2052, Sydney

8 <sup>2</sup> Diabetes and Metabolism Division, Garvan Institute of Medical Research, 384 Victoria  
9 Street, Darlinghurst, Sydney, NSW 2010, Australia

10  
11 \* To whom correspondence should be addressed:

12 Daniel Noble: [daniel.wa.noble@gmail.com](mailto:daniel.wa.noble@gmail.com)

13 Shinichi Nakagawa: [s.nakagawa@unsw.edu.au](mailto:s.nakagawa@unsw.edu.au)

## 14 15 **Abstract:**

- 16 1. Ecological and evolutionary research questions are increasingly requiring the  
17 integration of research fields along with larger datasets to address fundamental local  
18 and global scale problems. Unfortunately, these agendas are often in conflict with  
19 limited funding and a need to balance animal welfare concerns.
- 20 2. Planned missing data design (PMDD), where data are randomly and deliberately  
21 missed during data collection, is a simple and effective strategy to working under  
22 greater research constraints while ensuring experiments have sufficient power to  
23 address fundamental research questions. Here, we review how PMDD can be  
24 incorporated into existing experimental designs by discussing alternative design  
25 approaches and evaluating how data imputation procedures work under PMDD  
26 situations.
- 27 3. Using realistic examples and simulations of multilevel data we show how a variety of  
28 research questions and data types, common in ecology and evolution, can be aided by  
29 utilizing a PMDD and data imputation procedures. More specifically, we show how  
30 PMDD can improve statistical power in detecting effects of interest even with high  
31 levels (50%) of missing data and moderate sample sizes. We also provide examples of  
32 how PMDD can facilitate improved animal welfare all the while reducing research  
33 costs and constraints that would make endeavours for integrative research  
34 challenging.
- 35 4. Planned missing data designs are still in their infancy and we discuss some of the  
36 difficulties in their implementation and provide tentative solutions. Nonetheless, data  
37 imputation procedures are becoming more sophisticated and more easily implemented  
38 and it is likely that PMDD will be an effective and powerful tool for a wide range of  
39 experimental designs, data types and problems common in ecology and evolution.

40  
41  
42  
43 *Keywords:* data augmentation, multiple imputation, personality, quantitative genetics, mixed  
44 effects models, hierarchical models, multilevel modelling, refinement, reduction, multiple  
45 working hypotheses.

## 46 **Introduction**

47 Missing data is a widespread problem in ecological and evolutionary research (Nakagawa &  
48 Freckleton 2010; Nakagawa & Freckleton 2011; Ellington *et al.* 2015; Nakagawa 2017),  
49 often resulting in the exclusion of a substantial amount of data. This contributes to a major  
50 reduction in statistical power and, if the nature of ‘missingness’ is not considered carefully,  
51 leads to biased parameter estimates (Enders 2001b; Graham 2009; Nakagawa & Freckleton  
52 2010; Little *et al.* 2013). Theoretical frameworks for dealing with missing data, however,  
53 have received substantial attention and missing data theory is now a well-developed field of  
54 research grounded in solid statistical theory (Graham, Hofer & MacKinnon 1996; Enders  
55 2001a; Little & Rubin 2002; Graham 2003; Graham 2009; van Buuren 2012; Little *et al.*  
56 2013). Nonetheless, while social scientists have been at the forefront of applied missing data  
57 techniques, ecologists and evolutionary biologists have lagged behind (Nakagawa &  
58 Freckleton 2010).

59 Missing data is traditionally viewed by ecologists and evolutionary biologists with a  
60 sense of disdain and annoyance. But, what if including missing data in analyses could be  
61 advantageous? Indeed, social scientists have taken a rather different stance to missing data –  
62 instead embracing its power to help address fundamental research questions (Graham *et al.*  
63 2006). Planned missing data design (PMDD) is an approach that involves deliberately  
64 planning to ‘miss’ data as an integral part of an experiment. In other words, deliberately not  
65 collecting data on certain variables or experimental subjects. While this seems like an odd  
66 thing to do, if missing data in the variables of interest is completely random or can be made  
67 random, existing statistical frameworks are known to do an excellent job at recovering  
68 parameter estimates and standard errors compared to complete case analyses (Schafer &  
69 Graham 2002; van Buuren 2012). The PMDD approach comes with a substantial number of  
70 benefits that have been largely ignored by ecologists and evolutionary biologists.

71 Here, we argue that PMDD can expand the scope, reduce the costs and improve  
72 animal welfare, facilitating higher impact research with more power. We begin our  
73 discussion by briefly introducing missing data theory and then describe a few core statistical  
74 tools that can be used to impute / augment (i.e., ‘fill in’) missing data. Using simulations, we  
75 show that, when missing data is ‘completely’ random (see next section), existing data  
76 imputation techniques can be excellent at recovering parameter estimates and their standard  
77 errors – even with hierarchically structured data that is common in ecological and  
78 evolutionary research (Enders, Mistler & Keller 2016; Quartagno & Carpenter 2016; Resche-

79 Rigon & White 2016). We then describe PMDD, overviewing some of the different  
80 experimental approaches that can be implemented, what they involve and important design  
81 considerations. Following from this discussion, we overview the important benefits of  
82 utilizing a PMDD and end with a discussion on some of the challenges to their use –  
83 providing suggestions for how these can be rectified.

#### 84 **A brief introduction to missing data theory**

85 Missing data patterns can generally be classified as falling into one of three different types –  
86 based on the different mechanisms generating missing data – missing completely at random  
87 (MCAR), missing at random (MAR) and missing not at random (MNAR) (Rubin 1976; Little  
88 & Rubin 2002; Graham 2009; Nakagawa & Freckleton 2010; van Buuren 2012; Nakagawa  
89 2017). The distinction between these three missing data mechanisms is important to  
90 understanding the power of PMDD, which we will introduce below. Missing data (either in  
91 response or predictor variables) are considered to be MCAR when missingness is random  
92 with respect to both observed and unobserved (i.e., not collected in the study) variables  
93 (Enders 2001b; Nakagawa 2017). In other words, the observed data is simply a random sub-  
94 sample of complete data (Enders 2001b). In contrast, missing data are considered MAR when  
95 the missing values in a dataset depend on observed values of other variables in the dataset  
96 (Enders 2001b; Graham 2009). For example, if we were interested in understanding the  
97 correlation between survival to 1 year and mass at 6 months we would find that individuals  
98 that die before 6 months are missing data on mass, however, missing data on mass is  
99 correlated with their lifespan, which is known. Missing not at random (MNAR), however,  
100 occurs when missing values depend on unobserved variables that have not been quantified in  
101 the study, or on the variable itself. For example, we may be missing behavioural data on  
102 small sized animals within a population because they tend to be ‘shy’ and difficult to capture  
103 (e.g, Biro & Dingemanse 2009), in which case we would be missing both behavioural and  
104 morphological data. Under these situations, dealing with missing data is difficult (possibly  
105 even impossible) because statistical techniques for recovering missing information when data  
106 are MNAR are difficult to implement given the need to explicitly model the process of  
107 missingness (Schafer & Graham 2002).

108         These missing data mechanisms have different consequences on statistical results  
109 when missing data is excluded prior to analysis, as is often the case (i.e., referred to as  
110 ‘complete case’, ‘pairwise deletion’ or ‘listwise deletion’). While MCAR results in a loss of  
111 power when missing data is excluded from an analysis, it does not bias parameter estimates

112 (Enders 2001b; Schafer & Graham 2002; Graham 2009; Nakagawa & Freckleton 2010). In  
113 contrast, when missingness data is MAR or MNAR, excluding missing data will result in  
114 both a loss of power and biased parameter estimates (sometimes severely so; Enders 2001b;  
115 Schafer & Graham 2002; Graham 2009; Nakagawa & Freckleton 2010). To better appreciate  
116 the impact missing data can have on sample size (and thus statistical power), assume that we  
117 have 10 variables, each containing 5% missing data, and a total complete dataset of  $N =$   
118 1000. If we used all variables in a statistical model we may need to exclude as much as 500  
119 observations, resulting in a substantial decrease in power and severely compromising our  
120 ability to detect significant effects (see '*Recovering power of experimental designs*' for more  
121 on this issue). Statistical techniques for dealing with missing data rely on the assumption of  
122 missing data being MCAR or MAR, and if this assumption is met, then both power and bias  
123 in parameter estimates can be recovered (Enders 2001b; Schafer & Graham 2002; Nakagawa  
124 & Freckleton 2010; van Buuren 2012; Ellington *et al.* 2015; Nakagawa 2017).

### 125 **Statistical procedures for dealing with missing data**

126 Planned missing data design hinges on the ability of researchers to make use of statistical  
127 procedures for handling missing data (Little & Rubin 2002; Graham *et al.* 2006; Enders  
128 2010). It is therefore pertinent that we briefly review existing missing data techniques and  
129 provide some guidance on their implementation when data has been collected using a PMDD.  
130 We do not discuss these topics in great depth as there are a number of important, accessible  
131 reviews and books on these subjects already, which we direct the reader to for more details  
132 (Schafer 1997; Enders 2001b; Little & Rubin 2002; McKnight *et al.* 2007; Allison 2012; van  
133 Buuren 2012; Nakagawa 2017).

134 As mentioned above, imputation methods fall under two broad categories and we  
135 follow the general categorization of McKnight *et al.* (2007) in classifying them in to those  
136 implementing data augmentation (DA) techniques and those utilizing multiple imputation  
137 (MI) with the help of Rubin's rules (Rubin 1987; Enders 2010). Data augmentation  
138 procedures incorporate both observed and missing data into a single joint modelling approach  
139 that proceeds through the following steps: 1) the parameters of a model are estimated using  
140 observed data; 2) parameters estimated in step 1 are then used to augment missing data and 3)  
141 model parameters are re-assessed conditional on both the observed and imputed data (Figure  
142 1a; Nakagawa 2017). These steps are re-iterated until the model converges (i.e., maximum  
143 likelihood or stable posterior distribution) (Figure 1a). Data augmentation is advantageous in

144 that it is fast, easily implemented (under the assumption of multivariate normality) and results  
145 in robust parameter estimates and standard errors (McKnight *et al.* 2007).

146 In contrast, multiple imputation proceeds by generating a set of  $m$  (usually  $m = 40-50$   
147 performs well under a variety of situations and has high efficiency; Nakagawa & de  
148 Villemereuil 2015; Nakagawa 2017) complete datasets where missing data is imputed using  
149 variables of interest. These  $m$  datasets can then be analysed normally (i.e., as if a complete  
150 dataset existed) and the results (i.e., parameter estimates and standard errors) pooled across  
151 the  $m$  datasets (Figure 1b; Schafer 1997; Schafer & Olsen 1998; Little & Rubin 2002; van  
152 Buuren & Groothuis-Oudshoorn 2011; van Buuren 2012; Nakagawa 2017). Multiple  
153 imputation provides a number of advantages over data-augmentation. First, it is extremely  
154 flexible, easily accommodating different distributions (i.e., Bernoulli, Poisson etc.), variables  
155 and model types if needed. Second, since MI creates  $m$  complete datasets it allows one to  
156 separate out the imputation step from the analysis step. In other words, we can have a set of  
157 auxiliary variables (see '*Auxiliary variables to aid in imputation*' below) that are used to  
158 impute missing values and then subsequently use only the variables of biological interest to  
159 run the analysis on  $m$  imputed datasets. This is particularly advantageous because including  
160 unnecessary variables in DA procedures can complicate the interpretation of model results  
161 (McKnight *et al.* 2007; Enders 2010). Lastly, MI procedures account better for imputation  
162 uncertainty as variation in parameter estimates across data sets can be explicitly incorporated  
163 in pooled estimates, protecting against type I errors (McKnight *et al.* 2007). Additionally, the  
164 effect of missing data on analysis results (i.e. efficiency) can be explicitly quantified and  
165 presented by deriving statistics summarising the variability in parameter estimates across  
166 imputed datasets (McKnight *et al.* 2007). Given the flexibility, ease of implementation and  
167 their general tendency to produce robust parameter estimates, it is unsurprising that Rubin  
168 (1996) recommends MI procedures over DA.

169

#### 170 *Auxiliary variables to aid imputation*

171 Auxiliary variables are variables that are not necessarily of interest with respect to the  
172 biological question at hand, but that are correlated with other variables, or missing data itself,  
173 within the dataset (Collins, Schafer & Kam 2001; Graham 2003). Including auxiliary  
174 variables has been shown to improve the accuracy and stability of estimates and to reduce  
175 their standard error (Enders 2010; Allison 2012; von Hippel & Lynch 2013). The best  
176 auxiliary variables are those that are easy and cheap to collect and that are strongly correlated  
177 with a number of other variables within the data set (Collins, Schafer & Kam 2001; Graham

178 2003; von Hippel & Lynch 2013). Collins et al. (2001) have shown that auxiliary variables  
179 can be particularly useful when the missing data is in the response variable, when they  
180 change the missing data mechanism from MNAR to MAR and when the correlation between  
181 auxiliary variables and response is high ( $r = 0.9$ ). Adding even just 2–3 auxiliary variables  
182 can improve imputation procedures and for the most part, an inclusive analysis strategy  
183 where a large number of auxiliary variable are included in the analysis is recommended  
184 (Enders 2010 p.g. 128). However, this procedure can be slightly more complex than this in  
185 practice. Hardt et al. (2012) show that the inclusion of too many ( $> 10$ ) can start to lead to a  
186 downward bias in regression coefficients and a decrease in precision. In addition, auxiliary  
187 variables will have little impact when the correlations between variables in the dataset are  
188 low ( $r = 0.10$ ) (Hardt, Herke & Leonhart 2012). Therefore, we recommend including 36  
189 auxiliary variables with moderate to high correlations (0.4–0.8) when utilizing imputation  
190 procedures where unplanned missing data might cause data to follow MNAR conditions.

191 Experiments in ecology and evolution often collect variables that are not necessarily  
192 of interest, but can be used as auxiliary variables. These variables can include body  
193 dimensions, sex, age, spatial data, or even researcher ID. These types of auxiliary variables  
194 can be included in imputation procedures (e.g., MI) with unplanned missing data to ensure  
195 that the MAR assumption is met, but then discarded when testing the biological questions and  
196 hypotheses of interest (Graham 2003). Considering these variables more carefully with  
197 respect to their potential correlations with other variables, and possibly with missing data  
198 itself, is an important aspect of imputation because it can change missing data from MNAR  
199 to MAR satisfying assumptions of imputation procedures. As an illustrative example,  
200 consider mark-recapture field studies that often collect spatial coordinates (i.e., UTM  
201 positions) of animals. While the spatial position may not be of interest to the question of  
202 interest, it may be the case that spatial positions are correlated with missing data. This might  
203 be the case, if for example, observations are missing for some animals because their  
204 territories are located in thick impenetrable forest or are on the boundaries of the study site.  
205 One way to use these spatial coordinates might be to generate a spatial covariance matrix  
206 between observations be (possibly using the SpatialTools package in R – French 2016) and  
207 decompose this matrix into a set of principle components (PCs). The PCs could be then  
208 included into a multiple imputation model (e.g. those using *mice* or *mi* – Table 2) to help  
209 recover missing data on individuals that were not observed on a given sampling occasion.  
210 Similar approaches have been developed that make use of phylogenetic covariance matrices

211 (Nakagawa & de Villemereuil 2015) as well as the relatedness matrices (Hadfield 2008), and  
212 these have been shown to do an excellent job at recovering missing data.

## 213 **Planned missing data designs and their application in ecology and** 214 **evolution**

215 Planned missing data designs (PMDD) allow researchers to collect incomplete data from  
216 subjects or observations of subjects on purpose by randomly assigning them to have missing  
217 measurements or measurement occasions (Graham *et al.* 2006; Rhemtulla & Little 2012;  
218 Little & Rhemtulla 2013). Researchers can then utilize data augmentation and multiple  
219 imputation techniques (discussed above) to fill in missing data such that the data contains  
220 complete information for all variables and experimental units within the dataset. Importantly,  
221 PMDD should always conform to the MCAR assumption because missing data is random by  
222 virtue of the experimental design making it ideal for use with imputation methods (Little &  
223 Rhemtulla 2013).

224

### 225 *Subset Measurement Design*

226 Planned missing data design was first developed for research utilising questionnaires  
227 or surveys to help deal with participant fatigue, and is particularly useful when there are also  
228 logistical and financial constraints to asking many different questions (Graham, Hofer &  
229 Piccinin 1994; Graham *et al.* 2006). For example, a common type of PMDD called the *multi-*  
230 *form design* (MFD) involves creating alternative questionnaires that each contain overlapping  
231 questions and a sample of new questions (Graham *et al.* 2006; Little & Rhemtulla 2013).  
232 Combining data on participants across the questionnaires, and then treating the questions  
233 participants were not given as missing information, allows missing data to be imputed based  
234 on the covariance between known answers (Graham *et al.* 2006).

235 In ecology and evolutionary biology, we often do not use questionnaires to collect  
236 data (aside from the field of ethnobiology; see Albuquerque *et al.* 2014), therefore, an  
237 analogous design is what we refer to as a *subset measurement design* (SMD) (Table 1a).  
238 Similar to the MFD, a SMD involves quantifying a common set of variables across all  
239 individuals (e.g., body size) and then randomly allocating subjects to be quantified on a  
240 subset of other variables (e.g., hormone concentrations, metabolism etc.) (Table 1a).  
241 Common variables can be those that are easily or cheaply quantified, such as body size  
242 indices (e.g., mass, body / wing length) or age (if this is known). In contrast, variables that  
243 are expensive or logistically challenging to quantify (e.g., gene expression, hormone

244 concentrations) can be randomly sampled on a subset of subjects during the experiment.  
245 When using a SMD one should also consider, *a priori*, any potential interactions (Table 1a)  
246 of interest and whether the planned missingness provides sufficient power to test these  
247 interactions (Enders 2010).

248

#### 249 *Two-Method Design*

250 The SMD can also be applied to situations where researchers have a choice between  
251 two variables that quantify similar constructs or have similar meaning, but where one is more  
252 easily and cheaply quantified but has large measurement error and the second is more  
253 logistically challenging but is considered the ‘gold standard’ (i.e., lower measurement error /  
254 more informative to the question). The latter design is referred to as a *two-method design*  
255 (TMD) in the social sciences (Little & Rhemtulla 2013), and can be a useful way at  
256 improving data quality, particularly when some measurement variables are recognized as  
257 being more powerful in addressing certain questions than others. For example, we may be  
258 interested in measuring ‘metabolism’ using both whole-organism resting metabolic rate and  
259 by quantifying a major metabolic hormone, thyroxine (T4) (Table 1a). Thyroxine is known to  
260 impact cell metabolism but is both costly and a more indirect measure of assessing metabolic  
261 rate because it is only a single hormone in a cascade of hormone signalling pathways that  
262 affect ATP turnover in a cell. As such, depending on our question we may actually measure  
263 more animals on whole-organism metabolic rate and fewer on T4, as it better represents  
264 whole-organism metabolic rate *per se* and is cheaper.

265

#### 266 *Wave Missingness Design*

267 Longitudinal research questions, where repeated measurements on a set of  
268 independent individuals is of interest, can utilize a PMDD called *wave missingness* (Table  
269 1b) such that a group of experimental subjects are assigned to a wave or set of measurement  
270 occasions randomly (Little & Rhemtulla 2013; Rhemtulla *et al.* 2014). Waves can be blocked  
271 such that some animals are measured at the beginning and end and others in the middle (i.e.,  
272 pseudo-randomised missingness; Rhemtulla & Little 2012; Rhemtulla *et al.* 2014), or  
273 individuals can be randomized to a set number of waves were the measurement occasions are  
274 completely random (as in Table 1b). The specific design utilized will largely depend on the  
275 research question and the constraints faced in executing the study. For example, assume we  
276 are interested in understanding seasonal changes in individual hormone profiles and we  
277 would like to sample the same set of individuals at monthly intervals over the active season



278 (6 months). If we have 60 wild animals (that we can regularly re-capture) we may decide to  
279 randomly allocate 10 individuals to one of 6 sampling waves. The first wave samples a set of  
280 10 random individuals across all months, whereas the second wave samples a different 10  
281 animals at months 2, 3, 5 and 6 (Table 1b). We can continue this such that any one animal in  
282 waves 2–6 is sampled a total of 3–4 times. Missing measurement occasions within waves are  
283 random, but animals in wave one are deliberately sampled on each occasion to ensure we can  
284 get a complete picture of hormone changes across time at least on a subset of animals. The  
285 full dataset would contain a total of 360 blood samples if each animal was sampled once.  
286 However, with our design (Table 1) we would have 240 blood samples and approximately  
287 33% of the data would be missing. We could then impute missing data for subjects not  
288 measured on a given occasion.

289

### 290 *Considerations for and General Performance of Missing Data Designs*

291 We have overviewed three of the more common designs that can be applied to  
292 experimental systems, however, it is important to note that PMDD's can be diverse and are  
293 often not necessarily mutually exclusive of one another (Enders 2010; Rhemtulla & Little  
294 2012; Little & Rhemtulla 2013; Rhemtulla *et al.* 2014). Combinations of the designs  
295 described above are probably necessary in many real research situations. Regardless of which  
296 PMDD is used, researchers should choose the variables that are most pertinent to the specific  
297 hypothesis being tested, or those that are likely to have small effect sizes (and lower power),  
298 as those being measured with as little missing data as possible (i.e., having complete  
299 measurements on these variables). This ensures that the most pertinent questions can be  
300 tested rigorously (Graham *et al.* 2006). In addition, researchers should also consider the  
301 hypothesized correlation between variables. More tightly correlated variables ( $r > 0.50$ ) may  
302 allow for one to plan for a greater level of missing data than two variables that are weakly  
303 correlated.

304 While these designs can be powerful tools in aiding the testing of research questions,  
305 it is still unclear what designs work best at recovering parameter estimates and standard  
306 errors across various situations. Graham *et al.* (2006) and Enders (2010) (pg. 23–36) provide  
307 an excellent overview of the power of various PMDD's. Graham *et al.* (2006) showed that  
308 with moderate sample sizes ( $n = 200$ – $300$ ), subset measurement type designs can have  $>0.80$   
309 power in estimating even small effects in many situations (i.e.,  $d > 0.20$ ). Rhemtulla *et al.*  
310 (2014) also show that with reasonably large sample sizes ( $n = 300$  for multi-form design and  
311  $n = 500$  for wave missing and hybrid designs) that parameter estimates and standard errors in

312 latent growth models show little bias. In many situations, any loss in power resulting from  
313 missing data seems to be rather small relative to the gains in the number of questions that can  
314 be tested and the logistical and cost improvements for a given experiment (Enders 2010).  
315 PMDDs have, in some cases, even been shown to be more powerful than complete case  
316 designs under certain situations (See below for an example; Graham *et al.* 2006; Enders  
317 2010).

318

### 319 **Benefits of planned missing data design**

320 The PMDDs outlined above provide a number of important advantages for ecologists and  
321 evolutionary biologists. Below we discuss these benefits more thoroughly utilizing realistic  
322 simulations and examples to support our arguments.

323

#### 324 *(i) Improved statistical power*

325 We have already indicated above that missing data procedures can substantially increase the  
326 power of a given study by increasing the effective sample size. In the presence of missing  
327 data standard errors are estimated with less efficiency and thus the power to test the  
328 significance of an effect will decline (Little & Rhemtulla 2013). Studies in ecology and  
329 evolutionary biology are known to be under-powered in many cases (Møller & Jennions  
330 2002; Jennions & Møller 2003) and so this has important consequences for the inferences  
331 drawn in a given study. This is particularly true for multi-level data that often require large  
332 sample sizes to achieve sufficiently high power (van de Pol 2012) or even in genotype–  
333 phenotyping mapping studies, such as GWAS (here using imputation can also improve  
334 power; e.g., Marchini & Howie 2010). Integrating a PMDD into one’s experiment can  
335 recover the power lost after excluding missing data, facilitating the detection of small to  
336 moderate effects. To demonstrate how PMDD can improve inferences, even with multi-level  
337 hierarchical data, we conducted a couple simulations. In the first simulation, assume we are  
338 interested in estimating the between-individual level correlation between two traits ( $X_1 =$   
339 “boldness” and  $X_2 =$  “time to emerge after predatory attack”) using a multi-response model.  
340 We simulated three variables ( $X_1$ ,  $X_2$  and  $X_3$ ) that follow a multi-variate normal distribution  
341 (MVN) with between ( $B$ ) and within ( $W$ )-individual covariance matrices (assuming a  
342 standard deviation ( $SD$ ) = 1) as follows:

343 
$$\mathbf{X} \sim MVN \left( \begin{bmatrix} 2 \\ 4 \\ 10 \end{bmatrix}, \mathbf{B} + \mathbf{W} \right) \quad \text{eqn. 1}$$

344 
$$\mathbf{B} = \begin{pmatrix} 1 & 0.40 & 0 \\ 0.40 & 1 & 0 \\ 0 & 0 & 1 \end{pmatrix}, \mathbf{W} = \begin{pmatrix} 1 & 0 & 0 \\ 0 & 1 & 0 \\ 0 & 0 & 1 \end{pmatrix}$$

345

346 Note here that  $X_3$  is not of interest, but if it was correlated with  $X_1$ ,  $X_2$  or missing data itself,  
347 it could be used as an auxiliary variable to improve the imputation process. For this example,  
348 we simulated 1500 datasets under varying sample sizes (100 – 1000) and levels of missing  
349 data (5–50%) and estimated the between- and within-individual covariance matrices using  
350 data augmentation (maximum likelihood approaches) in *ASReml-R* (vers. 3.4.1). Missing  
351 data was assumed to be MCAR throughout the data sets, as would be the case in a PMDD,  
352 and we evaluated how well imputation and complete case analyses performed in estimating  
353 the covariance between  $X_2$  and  $X_1$  under these varying situations (Figure 2). As expected,  
354 given our MCAR assumption, we did not see much impact at all on the point estimate (~0.40;  
355 Figure 2a & b). Imputation procedures actually tended to do slightly better at estimating the  
356 point estimate as there was a slight downward bias (although not significantly so) for the  
357 complete case analysis with small sample sizes and high levels of missing data in our  
358 simulation (Figure 2a & b). Despite this, we observed a major improvement in the estimation  
359 of standard errors when imputing data in comparison to the complete case analysis (Figure 2c  
360 & d), suggesting that imputation procedures, even with hierarchical data such as this, can lead  
361 to fairly substantial improvements in power. This is particularly important as many areas of  
362 research, such as quantitative genetics and behavioural ecology, are indeed interested  
363 variance partitioning methods such as this (Dingemanse & Dochtermann 2013; Brommer &  
364 Class 2017; Careau & Wilson 2017).

365 Ecological and evolutionary questions are often more complex than simply estimating  
366 variance components. Experiments will often combine experimental manipulations of  
367 independent individuals and repeatedly measure these individuals across their life. To  
368 understand the benefits of PMDD at improving statistical inferences when both fixed and  
369 random effects might be of interest we conducted a second simulation. Assume we have  
370 manipulated the early thermal environment of a sample of lizard eggs – a common approach  
371 in lizard research (e.g., Noble, Stenhouse & Schwanz 2017). We might be interested in  
372 understanding how these thermal environments affect the growth curves of animals within  
373 each treatment (Figure 3). We simulated data assuming that individuals follow a linear  
374 growth trajectory (random regression model), at least over the period in which we measured  
375 their weight, according to the following model:

376

$$377 \quad m_{ij} = (\beta_0 + \alpha_i) + \beta_1 T_{ij} + (\beta_2 + s_j)A_{ij} + \beta_3(A_{ij} \cdot T_{ij}) + \varepsilon_{ij} \quad \text{eqn. 2}$$

378

379 where  $m_{ij}$  is the mass of individual  $i$  for observation  $j$ ,  $T_{ij}$  is a dummy variable ('0' or '1')  
380 indicating whether individual  $i$  belongs to the control group (23°C) or the treatment group  
381 (26°C),  $A_{ij}$  is the age of individual  $i$  at observation  $j$ ,  $\beta_1$  is the contrast between the control  
382 group mean at age 0 ( $\beta_0$ ) and the treatment mean at age 0,  $\beta_2$  is the effect of age on mass,  
383 and  $\beta_3$  is the interaction effect between change and mass across age and treatment group.  $\alpha_i$   
384 and  $s_j$  are individual level random effects assumed to follow an  
385  $\sim MVN\left(\begin{bmatrix} 0 \\ 0 \end{bmatrix}, \begin{bmatrix} 0.5 & 0.25 \\ 0.25 & 0.4 \end{bmatrix}\right)$  and  $\varepsilon_{ij}$  observation random effect (i.e., residual variance)  
386 assumed to follow an  $\sim N(0, 1)$ . An example of the simulated data along with parameters are  
387 shown in Figure 3. If we were only limited in the total amount of sampling, say 100  
388 observations, then we can design an experiment where 10 animals (5 / treatment) were each  
389 measured 10 times (*Scenario 1*) or we could use a PMDD whereby we increase the number  
390 of total individuals to  $n = 20$  (10 / treatment), but instead measure each individual randomly  
391 only five times, instead of 10 (*Scenario 2*) (Figure 3). Under these two scenarios we  
392 simulated 1500 datasets and used *ASReml-R* to estimate the parameters and their standard  
393 errors in eqn. 2. Overall, scenario 2 had a substantial number of benefits both with respect to  
394 estimating fixed and random effects performing nearly as well a complete data (i.e., 20  
395 individuals measured 10 times – *Scenario 3*). For all fixed effect estimates, there was  
396 between ~10–28% reduction in the standard errors with standard errors for the slopes and  
397 treatment interactions receiving a substantial boost. Most interestingly, we also see a greater  
398 ability to estimate random slopes more precisely (Table 2). Overall, our simulations suggest  
399 that PMDDs can provide power benefits under realistic experimental situations that are  
400 common in ecology and evolution.

401

402 *(ii) Improved animal welfare: considering the three 'R's'*

403 Central to research in ecology and evolutionary biology, particularly with respect to research  
404 on vertebrate animals, are issues surrounding animal welfare (Stamp Dawkins 2006; Barnard  
405 2007; Cuthill 2007; Stamp Dawkins 2008; McMahon *et al.* 2012). Biological research on  
406 vertebrates, and indeed any study species, should strive to alleviate pain, suffering and  
407 distress caused by experimentation (Cuthill 2007). Nonetheless, some pain and distress is  
408 acceptable should the research being undertaken be justified and sufficient to advance

409 knowledge. Critical to this point is the ability of research to ‘*advance knowledge*’, as this  
410 requires researchers to strike a balance between experimentation that involves large samples  
411 of independent animals (reducing type II errors and allowing one to detect an effect of  
412 interest) and the stress inflicted on experimental subjects (Cuthill 2007). The latter two  
413 points are often in conflict with each other, particularly when the experimentation involves  
414 invasive procedures, and we look to the three R’s (Refinement, Replacement and Reduction)  
415 to strike a balance between these important points (Cuthill 2007). Research in ecology and  
416 evolutionary biology often requires animal subjects to address empirical questions, either in  
417 the lab or the field, and so, replacement in many cases is not a viable option. Therefore,  
418 empiricists primarily try to design experiments with Refinement and Reduction in mind.

419         Planned missing data design can be an important tool during the experimental  
420 planning stages that directly targets two of the three R’s (Refinement and Reduction) to  
421 improve animal welfare. Often, PMDD can concurrently target both Refinement and  
422 Reduction at the same time by utilizing less invasive procedures and allowing data to be  
423 collected on fewer experimental subjects (or less often on a given subject). For example, we  
424 could use a subset measurement design to randomly assign the measurement of different  
425 physiological traits (e.g., metabolism, hormones) to a subset of subjects, reducing the number  
426 of subjects quantified on a given physiological measure. Additionally, fewer repeated  
427 physiological measurements can be done on a given subject by randomly assigning a  
428 different temporal sequence of measurements to individuals, refining the experimental design  
429 to reduce stress inflicted by repeated handling. Refinement can further occur by adopting a  
430 two-method design where different physiological assays measuring the same construct, say  
431 ‘innate immunity’, can be done in such a way that no one individual has both measurements,  
432 but rather is randomly assigned to the cheaper less invasive measure. In summary, PMDD  
433 can improve animal welfare without compromising our ability to effectively answer a given  
434 question by designing an experiment that has too little power.

435

### 436 *(iii) Reduced research costs*

437 One critical benefit of implementing PMDD is the ability to get a ‘bigger bang for your buck’  
438 in terms of the research cost to outcome ratio. The cost savings when using a PMDD design  
439 can be substantial, particularly for experiments involving expensive biochemical, proteomic,  
440 metabolomic and genomic work. For example, take our example of measuring hormone  
441 profiles for individuals across a six-month activity period (Table 1b). Using this PMDD  
442 design we were able to reduce our sample size from  $n = 360$  to  $n = 240$  individual samples

443 (i.e., using a subset measurement PMDD). If we assume that the cost of individual reactions  
444 to run assays, in addition to labour costs, was \$8 per sample, then we would save \$900 for  
445 this experiment. These additional savings could be used to run an additional follow up  
446 experiment or even go towards assaying a sub-sample of individuals on a second hormone  
447 that is known to interact with the first. Alternatively, we may be interested in quantifying  
448 telomere length to understand cellular senescence using either flow cytometry (estimated cost  
449 / sample = \$68) or qPCR (estimated cost / sample = \$13) methods (Nussey *et al.* 2014) to  
450 understand patterns of telomere attrition over the season in relation to hormones. In this  
451 example, using a PMDD would save \$8160 for flow cytometry methods or \$1560 using  
452 qPCR methods (assuming we really had money to do all animals). It also demonstrates how a  
453 two-method design can also save costs. Flow cytometry has been identified as a promising  
454 method for accurate, high throughput quantification of telomere length (Nussey *et al.* 2014).  
455 However, it is quite expensive compared to qPCR methods. A PMDD where a sample of  
456 animals are quantified both on qPCR and flow cytometry, and those missing flow cytometry  
457 data are then imputed would lead to a fairly substantial cost savings and allow one to verify  
458 the utility of both methods. We therefore view PMDD as a promising approach to improving  
459 cost efficiency.

460

461 *(iv) Stronger inferences and testing predictions from multiple working hypotheses*

462 Strong inference involves devising alternative hypotheses and then running an experiment or  
463 set of experiments to test alternative predictions generated from these hypotheses (Platt 1964;  
464 Chamberlain 1965). Identifying and testing among alternative hypotheses is the hallmark of  
465 rapid scientific progress, indeed Platt (1964) suggested that this was one of the primary  
466 reasons for the rapid advancement of molecular biology through the 1960s. Nonetheless, it is  
467 clear that ecological and evolutionary studies rarely test predictions from multiple working  
468 hypotheses (Betini, Avgar & Fryxell 2017). Betini *et al.* (2017) suggest a number of  
469 intellectual and practical barriers impeding the use of multiple working hypotheses, but  
470 particularly relevant for our argument are the barriers limiting one's ability to "execute"  
471 investigations involving multiple working hypotheses. Designing fully factorial experiments  
472 to disentangle predictions from alternative hypotheses is a major hurdle, referred to as the  
473 "*fallacy of the factorial design*" (Betini, Avgar & Fryxell 2017), whereby the addition of  
474 every new working hypothesis requires a new treatment or set of measurement variables  
475 leading to a geometric increase in number of required replicates. Including variables or  
476 experimental manipulations that test predictions from alternative hypotheses into a PMDD,

477 can off-set the need for prohibitively large sample sizes and time-consuming and costly  
478 measurements. These approaches may maximize the information gained from an experiment  
479 to facilitate more rapid scientific progress compared to testing single working hypotheses.  
480 Additionally, predictions from hypotheses can be tested using the same sample of  
481 experimental subjects, reducing the spatial and temporal differences between experiments.

482

483 *(v) Greater integration between research fields and disciplines*

484 Understanding ecological and evolutionary processes requires an integrative,  
485 multidisciplinary approach to tackling research questions (Wake 2009). Integrative research  
486 includes assimilating researchers with diverse expertise to identify problems and articulate  
487 their solutions. Often it requires holistic approaches to address fundamental questions,  
488 including the use of observational, experimental and theoretical modelling (Wake 2009).  
489 Questions involving integrative research cut across traditional boundaries, often making use  
490 of novel, and sometimes expensive techniques to help facilitate an understanding of a system  
491 or process. Despite its benefits, it can often be challenging to implement in practice given the  
492 different norms in various research fields, along with the costs and logistical constraints in  
493 doing integrative work. Nonetheless, PMDD may help facilitate more multidisciplinary  
494 research efforts as it alleviates these constraints.

495 To demonstrate the potential of PMDD in facilitating integrative research, assume  
496 that we are interested in testing Pace-of-life syndrome (POLS) theory (Reale *et al.* 2010).  
497 POLS theory explicitly predicts covariation between physiological, behavioural and life-  
498 history traits (Biro & Stamps 2008; Careau *et al.* 2010; Reale *et al.* 2010). Integration of  
499 suites of behavioural traits can lead to consistent individual differences in behaviour (i.e.  
500 personality - Reale *et al.* 2010; Stamps & Groothuis 2010) that can form behavioural  
501 syndromes (Sih & Bell 2008; Stamps & Groothuis 2010; Sih & Del Giudice 2012).  
502 Importantly, physiological mechanisms are thought to be the primary mechanisms (e.g.  
503 hormones, metabolism; Biro & Stamps 2008; Biro & Stamps 2010; Careau *et al.* 2010; Reale  
504 *et al.* 2010) underpinning both behavioural and life-history variation in populations.

505 Pace-of-life theory is therefore highly integrative, requiring concurrent measurements  
506 of physiological, behavioural and life-history traits to understand their covariance. It often  
507 requires laborious, time intensive, and sometimes costly measurements of the same  
508 individuals over time. Repeated measurements of the same animals over long periods of time  
509 pose major hurdles in obtaining the high quality longitudinal data required to rigorously test  
510 POL's theory. Additionally, physiological measures (e.g. metabolism, hormones, ROS,

511 immunity) can be costly to obtain (as indicated above) thus limiting the number of samples  
512 that can be collected. Nonetheless, the importance of taking many physiological  
513 measurements has been emphasized in different disciplines (Adamo 2004). Differences in the  
514 approaches and typical sample sizes of collaborators on might also be quite different and in  
515 conflict for such integrative projects.

516

## 517 **Challenges in implementing planned missing data designs**

518 As with any new research philosophy, there will be challenges, particularly in establishing  
519 the relevant and most suitable approaches that work across a wide diversity of different  
520 research questions and experimental designs in ecology and evolution. Given that PMDD is  
521 still new, stimulating interest in them will be the first step to identifying, solving and  
522 implementing solutions to some of the challenges that crop up. Below we discuss some of the  
523 hurdles we see to implementing PMDD and suggests some tentative solutions.

524

### 525 *Unplanned missing data*

526 Of course, as with any experiment, unplanned missing data will creep into PMDD designs.  
527 Often these data may be random, such as when a piece of equipment malfunctions during a  
528 set of measurements or when recording errors are identified and so the data are considered to  
529 be missing. Random instances of missing data, even if unplanned, will not affect the  
530 imputation process or the utility of PMDD unless missing data levels begin to get quite high.  
531 However, our simulations show, as well as others', that imputation procedures perform quite  
532 well even with large amounts of missing data (~50% – see Figure 1). Nonetheless, there are  
533 real situations where unplanned missing data can be MNAR and this will affect any  
534 experiment regardless of whether a PMDD is implemented or not. We have outlined above  
535 how data can be made MAR though the use of auxiliary variables, and these unplanned  
536 missing data, can then be imputed normally along with any planned missing data using the  
537 same statistical methods. We therefore advise colleagues to collect possible auxiliary  
538 variables where possible to counter unplanned missing data.

539

### 540 *Imputation with generalised linear mixed effect models*

541 Multiple imputation and DA both work well with normally distributed data, however,  
542 in reality variables often are non-normally distributed. While DA is limited to multivariate  
543 normality, MI procedures can also work with non-normal data fit using generalised linear



544 mixed effect models (e.g., Poisson GLMMs) (Schafer 1997). However, implementation in the  
545 context of GLMMs is still under active development, and in many cases, is restricted to  
546 simple random effect structures (van Buuren & Groothuis-Oudshoorn 2011; Enders, Mistler  
547 & Keller 2016; Quartagno & Carpenter 2016; Audigier & Resche-Rigon 2017). Nonetheless,  
548 two-level random regression models can be run in a number of existing packages (e.g., *mice*)  
549 and we believe that the capacity to run more sophisticated models will grow in the near  
550 future.

551 To re-assure readers that imputation can and does work with non-normal  
552 distributions, we provide a simulated example along with a sample of R code to demonstrate  
553 MI procedures with GLMMs in Box 1 (all R code for simulations are provided as  
554 supplementary material). For our hypothetical example, assume we are interested in  
555 provisioning rates (the number of feeding visits by a parent) in a bird species, the fictitious  
556 Missing Capped Warbler (*Sylvia absenscapilla*). We would like to understand the costs of  
557 female provisioning by experimentally manipulating brood sizes ( $n = 6$  chicks) in a random  
558 sample of birds compared to a control group, which has normal brood sizes ( $n = 3$  chicks)  
559 (Liebl, Browning & Russell 2016). The Missing Capped Warbler is notoriously difficult to  
560 observe as it is found in thick scrub, and so, we placed cameras at random nests during the  
561 first two weeks of the breeding season to observe provisioning rates in the two treatments  
562 over a 5-hour period. Provisioning rates are known to change as the chicks develop (Khwaja  
563 *et al.* 2017), and so, the cameras were on each nest for a total of 20 days to understand how  
564 the demands of chicks change, and whether females can keep up with these demands.  
565 Unfortunately, it is a laborious process to observe all the resulting video for 40 birds  
566 measured over 20 days (a total of 4000 hours of video!). We therefore decided to implement  
567 a planned missing data design, where we randomly sampled a set of videos ( $n = 536$  out of  
568 800 videos; ~ 33% missing data) where provisioning rates can be quantified (cutting the total  
569 hours of video watching to 2680 hours). After a long and laborious field season, we were able  
570 to collect data that shows a tendency for experimentally elevated clutch sizes to have higher  
571 rates of provisioning that increase over the care period (Figure 2). The planned missing data  
572 can be imputed, for example, using the *mice* package (see Box 1). We see that the imputed  
573 data matches well with the complete simulated dataset, with nearly identical results (see table  
574 in Box 1).

575

576 *Overcoming psychological barriers to missing data*

577 One of the biggest challenges to implementing PMDDs probably involves the need for  
578 researchers to over-come the ‘psychological taboos’ around missing data, and the suspicion  
579 of techniques for handling these missing data (Enders 2010). We can re-assure readers that  
580 missing data practices are now very well established (Graham *et al.* 2006; Nakagawa 2017),  
581 and are rather painlessly implemented in many commonly used statistical software such as R,  
582 SAS, SPSS, and MPlus (See Table 3 for an overview). In fact, many techniques are  
583 implemented by default when missing data is included as response variables in models for a  
584 number of mixed modelling packages (e.g. data augmentation procedures in ‘MCMCglmm’  
585 and ‘ASReml’). While statistical algorithms vary across these platforms, fairly sophisticated  
586 and versatile ones are now implemented in packages for some of the most widely used  
587 platforms (e.g. ‘mice’, ‘mi’, ‘multimput’ and ‘Amelia’ in the R environment – Table 3) that  
588 implement MI algorithms known to perform well under a wide variety of situations (Schafer  
589 & Graham 2002; van Buuren 2012; Enders, Mistler & Keller 2016; Quartagno & Carpenter  
590 2016; Resche-Rigon & White 2016; Audigier *et al.* 2017). These techniques are under active  
591 development (e.g., the *mice* package in R), and so we envisage the breadth of problems these  
592 tools can tackle to increase and be even easier to apply in the future. Nonetheless, caution is  
593 still needed in their implementation as it is unclear whether imputation procedures perform  
594 well under all circumstances (Nakagawa 2017). Statistical procedures for missing data are  
595 still rarely taught in undergraduate and graduate level courses, so part of the solution will be  
596 to begin educating students and practitioners about how to perform imputation procedures,  
597 explicitly highlighting some of the challenges and caveats that need to be considered.  
598 Nonetheless, there are now excellent resources that provide an in depth look at imputation  
599 procedures (Gelman & Hill 2002; Schafer & Graham 2002; Graham 2009; Enders 2010; Su  
600 *et al.* 2011; van Buuren & Groothuis-Oudshoorn 2011; Nakagawa 2017).

601

#### 602 *Uncertainties surrounding the best PMDD*

603 One challenge in implementing PMDD is the uncertainty around what the most appropriate  
604 missing data design is for a given experiment. This is particularly true in ecology and  
605 evolutionary biology because different questions, experimental systems, data structure and  
606 measurement variables may require creative combinations of different PMDD’s that we  
607 discuss in our paper, or possibly even new ones! While we argue that the benefits of PMDD  
608 can be substantial it will still likely be important to test the robustness of any given design –  
609 possibly through simulations to test the power of different types of missing data designs.  
610 With some very simple simulated data based on effect sizes and experimental designs

611 relevant to the question at hand, the power of different PMDD's can be thoroughly tested  
612 during the design stage of an experiment (Enders 2010). Enders (2010 p.g. 30) provide a nice  
613 introduction on how to conduct power analysis with PMDD's using simulations, and we  
614 provide all our R code which we hope can act as a skeleton for readers to familiarize  
615 themselves with simulations to help them sort out the best PMDD for their particular  
616 situation. Additionally, new multi-level simulation packages, such as SQuID, allow for  
617 researchers to simulate hierarchical data easily (Allegue *et al.* 2017). Data can be downloaded  
618 and a missing data introduced to evaluate the power of different PMDD's. While definitive  
619 guidelines will depend on the experimental design, question and covariance between traits,  
620 we believe that up to ~30% missing data overall across a wide variety of different designs  
621 will likely not compromise performance of imputation procedures.

## 622 **Conclusions and future directions**

623 Our goal was to put planned missing data design on the radar of ecologists and evolutionary  
624 biologists given the substantial number of ethical, logistical and cost saving benefits it  
625 affords. We have provided some guidance on possible PMDD that can be implemented in  
626 research programs and shown with simulations that even with hierarchical / multilevel data  
627 imputation procedures can perform quite well. While it is still unclear whether imputation  
628 procedures in a multilevel framework will work under all circumstances there is increasing  
629 awareness of the need to develop such techniques with hierarchical data and in many cases  
630 existing methods will likely perform well (Drechsler 2015; Quartagno & Carpenter 2016;  
631 Audigier & Resche-Rigon 2017; Audigier *et al.* 2017). We encourage colleagues to begin  
632 thinking about PMDD's and their utility in their research both to improve research quality  
633 and to promote integrative, cost effective research projects in ecology and evolutionary  
634 biology.

## 635 **Acknowledgements**

636 We would like to thank the I-DEEL lab (Joel Pick, Rose O'Dea, Malgorzata Lagisz, and  
637 Fonti Kar) and Diego Bameche for feedback on previous versions of our manuscript, along  
638 with anonymous reviewers for constructive comments that greatly improved our manuscript.  
639 DWAN was supported by an ARC Discovery Early Career Research Award (DE150101774)  
640 and SN an ARC Future Fellowship (FT130100268). The authors declare no conflicts of  
641 interest.

642

## 643 **Author's contributions**

644 SN and DN conceived the research. DN and SN conducted the simulations. DN wrote the  
645 manuscript, with input from SN. SN contributed critically and constructively to the revisions  
646 of the manuscript.

## 647 **Data Accessibility**

648 All R code and simulation results used in the manuscript were provided upon submission.

## 649 **References**

- 650 Adamo, S.A. (2004) How should behavioural ecologists interpret measurements of  
651 immunity? *Animal Behaviour*, **68**, 1443–1449.
- 652 Albuquerque, U.P., Ramos, M.A., Paiva de Lucena, R.F. & Alencar, N.L. (2014) *Methods  
653 and techniques in ethnobiology and ethnoecology*. Springer, New York.
- 654 Allegue, H., Araya-Ajoy, Y.G., Dingemanse, N.J., Dochtermann, N.A., Garamszegi, L.Z.,  
655 Nakagawa, S., Réale, D., Schielzeth, H., Westneat, D.F. & Hadfield, J. (2017)  
656 Statistical Quantification of Individual Differences (SQuID): an educational and  
657 statistical tool for understanding multilevel phenotypic data in linear mixed models.  
658 *Methods in Ecology and Evolution*, **8**, 257–267.
- 659 Allison, P.D. (2012) Handling missing data by maximum likelihood. *SAS Global Forum,  
660 Statistics and Data Analysis, Statistical Horizons, Haverford, PA, USA*.
- 661 Audigier, V. & Resche-Rigon, M. (2017) micemd: Multiple imputation by chained equations  
662 with multilevel data. *R package version 1.1.0*. [https://cran.r-  
663 project.org/package=micemd](https://cran.r-project.org/package=micemd).
- 664 Audigier, V., White, I.R., Jolani, S., Debray, T.P.A., Quartagno, M., Carpenter, J., van  
665 Buuren, S. & Resche-Rigon, M. (2017) Multiple imputation for multilevel data with  
666 continuous and binary variables. *arXiv*, 1–38.
- 667 Barnard, C. (2007) Ethical regulation and animal science: why animal behaviour is special.  
668 *Animal Behaviour*, **74**, 5–13.
- 669 Betini, G.S., Avgar, T. & Fryxell, J.M. (2017) Why are we not evaluating multiple competing  
670 hypotheses in ecology and evolution? *Royal Society Open Science*, **4**, 160756.
- 671 Biro, P.A. & Dingemanse, N.J. (2009) Sampling bias resulting from animal personality.  
672 *Trends in Ecology & Evolution*, **24**, 66–67.
- 673 Biro, P.A. & Stamps, J.A. (2008) Are animal personality traits linked to life-history  
674 productivity? *Trends in Ecology & Evolution*, **23**, 361–368.
- 675 Biro, P.A. & Stamps, J.A. (2010) Do consistent individual differences in metabolic rate  
676 promote consistent individual differences in behavior? *Trends in Ecology and  
677 Evolution*, **25**, 653–659.
- 678 Brommer, J.E. & Class, B. (2017) Phenotypic correlations capture between-individual  
679 correlations underlying behavioural syndromes. *Behavioral Ecology and  
680 Sociobiology*, **71**, 50.
- 681 Butler, D. (2009) asreml: asreml() fits the linear mixed model. *R package version 3.0*.  
682 <http://www.vsnr.co.uk/>.
- 683 Careau, V., Réale, D., Humphries, M.M. & Thomas, D.W. (2010) The pace of life under  
684 artificial selection: Personality, energy expenditure, and longevity are correlated in  
685 domestic dogs. *The American Naturalist*, **175**, 753–758.

- 686 Careau, V. & Wilson, R.S. (2017) Of Uberfleas and Krakens: Detecting Trade-offs Using  
687 Mixed Models. *Integrative and Comparative Biology*.
- 688 Chamberlain, T.C. (1965) The method of multiple working hypotheses. *Science*, **148**, 754–  
689 759.
- 690 Collins, L.M., Schafer, J.L. & Kam, C.-M. (2001) A comparison of inclusive and restrictive  
691 strategies in modern missing data procedures. *Psychological Methods*, **6**, 330-351.
- 692 Cuthill, I.C. (2007) Ethical regulation and animal science: why animal behaviour is not so  
693 special. *Animal Behaviour*, **74**, 15–22.
- 694 Dingemans, N.J. & Doehrmann, N.A. (2013) Quantifying individual variation in  
695 behaviour: mixed-effect modelling approaches. *J Anim Ecol*, **82**, 39-54.
- 696 Drechsler, J. (2015) Multiple imputation of multilevel missing data - rigor versus simplicity.  
697 *Journal of Educational and Behavioral Statistics*, **40**, 69-95.
- 698 Ellington, E.H., Bastille-Rousseau, G., Austin, C., Landolt, K.N., Pond, B.A., Rees, E.E.,  
699 Robar, N. & Murray, D.L. (2015) Using multiple imputation to estimate missing data  
700 in meta-regression. *Methods in Ecology and Evolution*, **6**, 153-163.
- 701 Enders, C.K. (2001a) The impact of nonnormality on full information maximum-likelihood  
702 estimation for structural equation models with missing data. *Psychological Methods*,  
703 **6**, 352-370.
- 704 Enders, C.K. (2001b) A primer on maximum likelihood algorithms available for use with  
705 missing data. *Structural Equation Modeling*, **8**, 128-141.
- 706 Enders, C.K. (2010) *Applied missing data analysis*. The Guilford Press, New York, USA.
- 707 Enders, C.K., Mistler, S.A. & Keller, B.T. (2016) Multi-level multiple imputation: A review  
708 and evolution of joint modeling and chained equations imputation. *Psychological*  
709 *Methods*, **21**, 222-240.
- 710 French, J. (2016) SpatialTools: Tools for spatial data analysis. *R package version 1.0.2*.  
711 <https://cran.r-project.org/package=SpatialTools>.
- 712 Gelman, A. & Hill, J. (2002) *Data analysis using regression and multilevel/hierarchical*  
713 *models*. Cambridge University Press.
- 714 Graham, J.W. (2003) Adding missing-data-relevant variables to FIML-based structural  
715 equation models. *Structural Equation Modeling*, **10**, 80-100.
- 716 Graham, J.W. (2009) Missing data analysis: Making it work in the real world. *Annual Review*  
717 *of Psychology*, **60**, 549-576.
- 718 Graham, J.W., Hofer, S.M. & MacKinnon, D.P. (1996) Maximizing the usefulness of data  
719 obtained with planned missing value patterns: An application of maximum likelihood  
720 procedures. *Multivariate Behavioral Research*, **31**, 197-218.
- 721 Graham, J.W., Hofer, S.M. & Piccinin, A.M. (1994) Analysis with missing data in drug  
722 prevention research. *Advances in data analysis for prevention intervention research*  
723 (eds L.M. Collins & L. Seitz), pp. 13–63. National Institute on Drug Abuse Research  
724 monograph series, Washington, DC, USA.
- 725 Graham, J.W., Taylor, B.J., Olchowski, A.E. & Cumsille, P.E. (2006) Planned missing data  
726 designs in psychological research. *Psychological Methods*, **11**, 323-343.
- 727 Hadfield, J.D. (2008) Estimating evolutionary parameters when viability selection is  
728 operating. *Proc Biol Sci*, **275**, 723-734.
- 729 Hadfield, J.D. (2010) MCMC methods for multi-response generalised linear mixed models:  
730 The MCMCglmm R package. *Journal of Statistical Software*, **33**, 1–22.
- 731 Hardt, J., Herke, M. & Leonhart, R. (2012) Auxiliary variables in multiple imputation in  
732 regression with missing X: a warning against including too many in small sample  
733 research. *BMC Biomedical Research Methodology*, **12**, 1–13.
- 734 Honaker, J., King, G. & Blackwell, M. (2011) Amelia II: A program for missing data.  
735 *Journal of Statistical Software*, **45**, 1–47.

- 736 Jennions, M.D. & Møller, A.P. (2003) A survey of the statistical power of research in  
737 behavioral ecology and animal behavior. *Behavioral Ecology*, **14**, 438–445.
- 738 Khwaja, N., Preston, S.A.J., Hatchwell, B.J., Briskie, J.V., Winney, I.S. & Savage, J.L.  
739 (2017) Flexibility but no coordination of visits in provisioning riflemen. *Animal*  
740 *Behaviour*, **125**, 25–31.
- 741 Kleinke, K. & Reinecke, J. (2013) *countimp*: Multiple imputation of incomplete count data. *R*  
742 *package version 1.0*.
- 743 Liebl, A.L., Browning, L.E. & Russell, A.F. (2016) Manipulating carer number versus brood  
744 size: complementary but not equivalent ways of quantifying carer effects on  
745 offspring. *Behav Ecol*, **27**, 1247–1254.
- 746 Little, T.D., Jorgensen, T.D., Lang, K.M. & Moore, E.W. (2013) On joys of missing data.  
747 *Journal of Pediatric Psychology*, doi:10.1093/jpepsy/jst048, 1–12.
- 748 Little, T.D. & Rhemtulla, M. (2013) Planned missing data designs for developmental  
749 researchers. *Child Development Perspectives*, **7**, 199–204.
- 750 Little, T.D. & Rubin, D.B. (2002) *Statistical analysis with missing data*. John Wiley & Sons.,  
751 New York, 2nd edition.
- 752 Marchini, J. & Howie, B. (2010) Genotype imputation for genome-wide association studies.  
753 *Nat Rev Genet*, **11**, 499–511.
- 754 McKnight, P.E., Mcknight, K.M., Sidani, S. & Figueredo, A.J. (2007) *Missing data: A gentle*  
755 *introduction*. The Guilford Press., New York, USA.
- 756 McMahon, C.R., Harcourt, R., Bateson, P. & Hindell, M.A. (2012) Animal welfare and  
757 decision making in wildlife research. *Biological Conservation*, **153**, 254–256.
- 758 Møller, A.P. & Jennions, M.D. (2002) How much variance can be explained by ecologists  
759 and evolutionary biologists? *Oecologia*, **132**, 492–500.
- 760 Nakagawa, S. (2017) Missing data: mechanisms, methods, and messages. *Ecological*  
761 *Statistics: Contemporary Theory and Application* (eds G.A. Fox, S. Negrete-  
762 Yankelevich & V.J. Sosa), pp. 81–105. Oxford University Press., Great Clarendon  
763 Street, Oxford, UK.
- 764 Nakagawa, S. & de Villemereuil, P. (2015) A simple and general method for accounting for  
765 phylogenetic uncertainty via Rubin’s rules in comparative analysis. *Peer J. PrePrints*,  
766 **3:e1216v1**.
- 767 Nakagawa, S. & Freckleton, R.P. (2010) Missing in action: the dangers of ignoring missing  
768 data. *Trends in Ecology & Evolution*, **23**, 592–596.
- 769 Nakagawa, S. & Freckleton, R.P. (2011) Model averaging, missing data and multiple  
770 imputation: A case study for behavioural ecology. *Behavioral Ecology and*  
771 *Sociobiology*, **65**, 103–116.
- 772 Noble, D.W.A., Stenhouse, V. & Schwanz, L.E. (2017) Developmental temperatures and  
773 phenotypic plasticity in reptiles: a systematic review and meta-analysis. *Biol Rev*  
774 *Camb Philos Soc*.
- 775 Nussey, D.H., Baird, D., Barrett, E., Boner, W., Fairlie, J., Gemmell, N., Hartmann, N., Horn,  
776 T., Haussmann, M., Olsson, M., Turbill, C., Verhulst, S., Zahn, S. & Monaghan, P.  
777 (2014) Measuring telomere length and telomere dynamics in evolutionary biology and  
778 ecology. *Methods in Ecology and Evolution*, **5**, 299–310.
- 779 Platt, J.R. (1964) Strong inference *Science*, **146**, 347–353.
- 780 Quartagno, M. & Carpenter, J. (2016) *jomo*: A package for multilevel joint modelling  
781 multiple imputation. *R package version 2.2-0*.
- 782 Reale, D., Garant, D., Humphris, M.M., Bergeron, P., Careau, V. & Montiglio, P.-O. (2010)  
783 Personality and the emergence of the pace-of-life syndrome concept at the population  
784 level. *Philosophical Transactions of the Royal Society B: Biological Sciences*, **365**,  
785 4051–4063.

- 786 Resche-Rigon, M. & White, I.R. (2016) Multiple imputation by chained equations for  
787 systematically and sporadically missing multilevel data. *Stat Methods Med Res.*
- 788 Rhemtulla, M., Jia, F., Wu, W. & Little, T.D. (2014) Planned missing designs to optimize the  
789 efficiency of latent growth parameter estimates. *International Journal of Behavioral*  
790 *Development*, **38**, 423-434.
- 791 Rhemtulla, M. & Little, T.D. (2012) Planned missing data designs for research in cognitive  
792 development. *Journal of Cognition and Development*, **13**, 425-438.
- 793 Rubin, D.B. (1976) Inference and missing data. *Biometrika*, **63**, 581-592.
- 794 Rubin, D.B. (1987) *Multiple imputation for non-response in surveys*. Wiley, New York.
- 795 Rubin, D.B. (1996) Multiple imputation after 18+ years. *Journal of the American Statistical*  
796 *Association*, **91**, 473-489.
- 797 Schafer, J.L. (1997) *Analysis of incomplete multivariate data*. Chapman & Hall / CRC Press.,  
798 Boca Raton, USA.
- 799 Schafer, J.L. & Graham, J.W. (2002) Missing data: our view of the state of the art.  
800 *Psychological Methods*, **7**, 147-177.
- 801 Schafer, J.L. & Olsen, M.K. (1998) Multiple imputation for multivariate missing-data  
802 problems: A data analyst's perspective. *Multivariate Behavioural Research*, **33**, 545-  
803 571.
- 804 Sih, A. & Bell, A.M. (2008) Insights for behavioural ecology from behavioural syndromes.  
805 *Advances in the Study of Animal Behaviour*, **38**, 227-281.
- 806 Sih, A. & Del Giudice, M. (2012) Linking behavioural syndromes and cognition: a  
807 behavioural ecology perspective. *Philosophical Transactions of the Royal Society of*  
808 *London B Biological Sciences*, **367**, 2762-2772.
- 809 Stamp Dawkins, M. (2006) A user's guide to animal welfare science. *Trends in Ecology &*  
810 *Evolution*, **21**, 77-82.
- 811 Stamp Dawkins, M. (2008) The science of animal suffering. *Ethology*, **114**, 937-945.
- 812 Stamps, J.A. & Groothuis, G.G. (2010) The development of animal personality: relevance,  
813 concepts and perspectives. *Biological Reviews (Cambridge)*, **85**, 301-325.
- 814 Su, Y.-S., Gelman, A., Hill, J. & Yajima, M. (2011) Multiple imputation with diagnostics  
815 (mi) in R: Opening windows into the black box. *Journal of Statistical Software*, **45**,  
816 1-31.
- 817 van Buuren, S. (2012) *Flexible imputation of missing data*. In: *The handbook of advanced*  
818 *multilevel analysis*. CRC Press, Taylor and Francis Group, Boca Raton, FL, USA, pp  
819 173-196.
- 820 van Buuren, S. & Groothuis-Oudshoorn, K. (2011) mice: Multivariate imputation by chained  
821 equations in R. *Journal of Statistical Software*, **45**, 1-64.
- 822 van de Pol, M. (2012) Quantifying individual variation in reaction norms: how study design  
823 affects the accuracy, precision and power of random regression models. *Methods in*  
824 *Ecology and Evolution*, **3**, 268-280.
- 825 von Hippel, P. & Lynch, J. (2013) Efficiency gains from using auxiliary variables in  
826 imputation. *Cornell University Library*, **arXiv:1311.5249**.
- 827 Wake, M.H. (2009) Integrative biology: Science for the 21st century. *BioScience*, **58**, 349-  
828 353.
- 829

830

831 **Tables and Figures**

832 **Table 1** – Two types of planned missing data designs relevant for ecological and  
 833 evolutionary research. a) Subset measurement designs randomize a set of variables to be  
 834 measured on a sample of individuals. Body mass (BM) is strongly correlated with all three  
 835 other variables and so is measured on all individuals in the study (complete cases). In  
 836 contrast, molecular determination of sex is needed with our species, and along with thyroxine  
 837 (T4) can be costly to quantify so these traits are measured on a sample of individuals.  
 838 Metabolism is also time consuming to measure and so is also only quantified on a sub-sample  
 839 of animals. While we can estimate all main effects (i.e., single variables of interest) with this  
 840 design, if interactions are of interest then one should have a PMDD that ensures there is  
 841 enough data to effectively estimate the interaction parameters. b) Wave missing design can  
 842 be applied to longitudinal data. Each wave contains a set of 10 random individuals and their  
 843 measurement occasions across six months are indicated with ‘1’. Forty individuals are  
 844 measured each month, but a different sub-sample of the 60 total through the experiment.  
 845 Abbreviations: BM = body mass, S = Sex, M = metabolism; TH = thyroxine (T4).  
 846

847 *a) Subset Measurement Design*

| Variable  | Variables     |           |          |          | Interactions   |            |
|-----------|---------------|-----------|----------|----------|----------------|------------|
|           | <i>subset</i> | <i>BM</i> | <i>S</i> | <i>M</i> | <i>TH (T4)</i> | <i>M*S</i> |
| <i>S1</i> | 1             | –         | 1        | 1        | –              | 1          |
| <i>S2</i> | 1             | 1         | –        | 1        | –              | –          |
| <i>S3</i> | 1             | 1         | 1        | –        | 1              | 1          |
| <i>S4</i> | 1             | –         | –        | 1        | –              | –          |
| <i>S5</i> | 1             | 1         | 1        | 1        | 1              | 1          |

848

849 *b) Wave Missing Design*

| Measurement | Month |   |   |   |   |   |
|-------------|-------|---|---|---|---|---|
|             | Wave  | 1 | 2 | 3 | 4 | 5 |
| 1           | 1     | 1 | 1 | 1 | 1 | 1 |
| 2           | –     | 1 | 1 | – | 1 | 1 |
| 3           | 1     | – | – | 1 | 1 | 1 |
| 4           | –     | 1 | 1 | 1 | – | – |
| 5           | 1     | – | – | 1 | 1 | – |
| 6           | 1     | 1 | 1 | – | – | 1 |

850

851



852

853 **Table 2** – Effect of two scenarios on the ability to estimate parameters of a mixed model.  
 854 Average parameter estimates and their standard errors for both fixed and random effects over  
 855 1500 simulated datasets. Example data is shown in figure 2 and a description of the two  
 856 scenarios are provided in the text. Abbreviations and symbols as follows:  $\rho$ : correlation  
 857 between intercept ( $\alpha$ ) and slope ( $s$ );  $\sigma_{\alpha}^2$  = variance estimate for random intercept;  $\sigma_s^2$  =  
 858 variance estimate for random slope; trt = treatment; age = change in mass across age. % SE  
 859 Decrease = the percent decrease in standard error from Scenario 1 compared to Scenario 2.  
 860 “True” are the true parameters that the simulation was based on. Scenario 3 is also provided  
 861 for comparison. In scenario 3, this is the full data set (i.e., 20 animals, measured 10 times).

862

863

864

|                       | Scenario 1  |           | Scenario 2  |           | Scenario 3  |           | % SE<br>Decrease | True |
|-----------------------|-------------|-----------|-------------|-----------|-------------|-----------|------------------|------|
| <i>Fixed Effects</i>  |             |           |             |           |             |           |                  |      |
|                       | <i>Est.</i> | <i>SE</i> | <i>Est.</i> | <i>SE</i> | <i>Est.</i> | <i>SE</i> |                  |      |
| intercept             | 1.21        | 0.45      | 1.22        | 0.40      | 1.19        | 0.31      | 9.83             | 1.20 |
| trt                   | 2.01        | 0.63      | 1.98        | 0.57      | 2.00        | 0.44      | 9.82             | 2    |
| age                   | 1.79        | 0.28      | 1.80        | 0.21      | 1.79        | 0.20      | 27.06            | 1.8  |
| trt*age               | 1.61        | 0.40      | 1.60        | 0.29      | 1.60        | 0.28      | 27.06            | 1.6  |
| <i>Random Effects</i> |             |           |             |           |             |           |                  |      |
|                       | <i>Est.</i> | <i>SE</i> | <i>Est.</i> | <i>SE</i> | <i>Est.</i> | <i>SE</i> |                  |      |
| $\sigma_{\alpha}^2$   | 0.57        | 0.55      | 0.62        | 0.59      | 0.51        | 0.34      | -6.96            | 0.50 |
| $\rho(s, \alpha)$     | 0.24        | 0.25      | 0.23        | 0.21      | 0.24        | 0.16      | 16               | 0.25 |
| $\sigma_s^2$          | 0.41        | 0.21      | 0.41        | 0.15      | 0.40        | 0.14      | 31.26            | 0.40 |

865

866

867

868

869

870

871

872 **Table 3** – Examples of common packages and statistical programs that can be used to deal  
 873 with missing data. Abbreviations are as follows: SA = stand-alone program; MI = multiple  
 874 imputation; DA = data augmentation; B = both, R = response, P = predictors. Y = yes.

875

| Package         | Prog. | Algorithms | Response/<br>Predictor | Multi-<br>level | Reference / link                                                                                                                                                          |
|-----------------|-------|------------|------------------------|-----------------|---------------------------------------------------------------------------------------------------------------------------------------------------------------------------|
| <i>mi</i>       | R     | MI         | B                      | Y               | Su et al. (2011)                                                                                                                                                          |
| <i>mice</i>     | R     | MI         | B                      | Y               | Van Buuren & Groothuis-Oudshoorn (2011)                                                                                                                                   |
| <i>micemd</i>   | R     | MI         | B                      | Y               | Audigier & Resche-Rigon (2017)                                                                                                                                            |
| <i>jomo</i>     | R     | MI         | B                      | Y               | Quartagno & Carpenter (2016)                                                                                                                                              |
| <i>Amelia</i>   | R     | MI         | B                      | Y               | Honaker et al. (2011)                                                                                                                                                     |
| <i>multimp</i>  | R     | MI         | B                      | Y               | <a href="https://github.com/inbo/multimp">https://github.com/inbo/multimp</a>                                                                                             |
| <i>MCMCglmm</i> | R     | DA         | R                      | Y               | Hadfield (2010)                                                                                                                                                           |
| <i>ASReml</i>   | R/SA  | DA         | B                      | Y               | Butler (2009)                                                                                                                                                             |
| <i>SAS</i>      | SA    | DA/MI      | B                      | Y               | <a href="https://stats.idre.ucla.edu/sas/seminars/multiple-imputation-in-sas/mi_new_1/">https://stats.idre.ucla.edu/sas/seminars/multiple-imputation-in-sas/mi_new_1/</a> |
| <i>SPSS</i>     | SA    | DA/MI      | B                      | ?               | <a href="https://www.ibm.com/marketplace/spss-missing-values">https://www.ibm.com/marketplace/spss-missing-values</a>                                                     |
| <i>MPlus</i>    | SA    | DA         | B                      | Y               | <a href="https://www.statmodel.com/index.shtml">https://www.statmodel.com/index.shtml</a>                                                                                 |

876

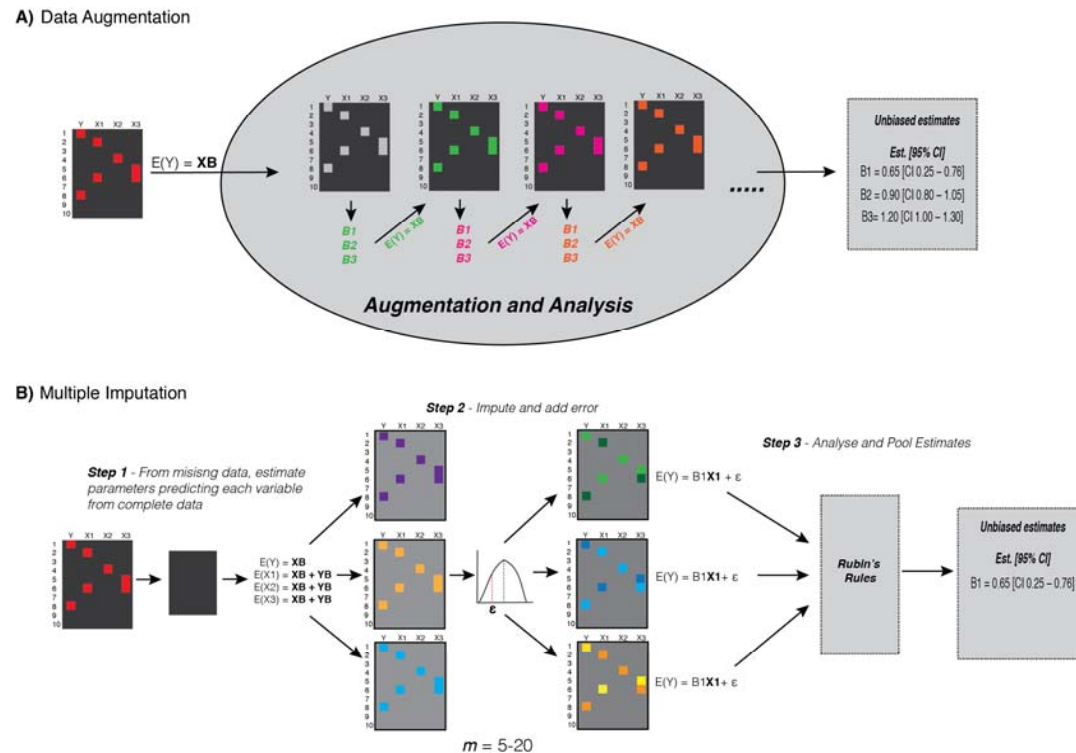

**Figure 1** – Two major types of imputation procedures A) data augmentation (e.g., full information maximum likelihood, expectation maximization) and B) multiple imputation. Each large square represents a dataset containing four variables (Y, X1, X2, X3) and  $n = 10$  observations. Small red squares represent missing data and black squares complete data. Data augmentation procedures (A) take both observed and missing data in the analysis under a pre-specified model [ $E(Y) = \mathbf{XB}$ ]], augment missing data, estimate parameter estimates (B1, B2, B3) and then re-iterate this process with updated parameters [different coloured B1, B2, B3 and  $E(Y) = \mathbf{XB}$ ] until the model converges on a set of unbiased parameter estimates. Multiple imputation (B) uses complete data and often (but not always) uses other variables within the data as predictors of a specific variable. It then imputes using regression equations plausible values of missing data for  $m$  complete datasets. To prevent biased estimates residual error is added to each of the imputed data points (checkered small squares in step 2). These  $m$  datasets are then analysed with a given model, which can be different from the ones used to impute and, using Rubin's rules (Rubin 1987), pool the parameter estimates across datasets (in this case B1). Abbreviations are as follows: E = expectation of variable, or mean estimate of variable; X = design matrix; B = vector of parameter estimates (e.g., B1, B2, B3);  $\epsilon$  = residual effect or random error.

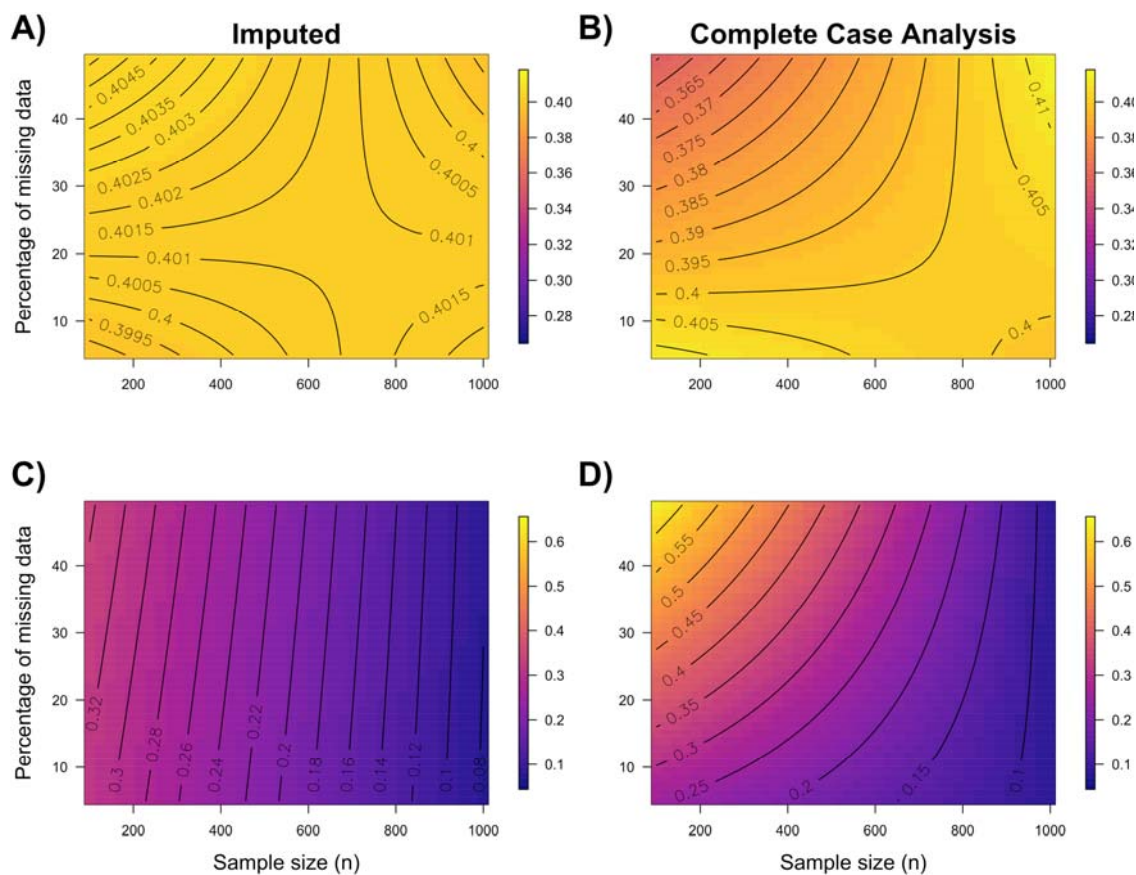

**Figure 2** – Simulation results of the estimation of a between-individual correlation for two traits [  $(X_1, X_2) = 0.40$ ] under varying levels of missing data (5–50%) and sample sizes ( $n = 100–1000$ ). Plots show average point estimates (a & b) and their corresponding standard errors (c & d) from 1500 randomly generated datasets when imputing missing data (a & c) or running a complete case analysis (excluding missing data – b & d). Note that convergence problems are more prevalent with small samples and high levels of missing data. Parameter estimates and their precisions are therefore summarised on simulations in which models did converge.

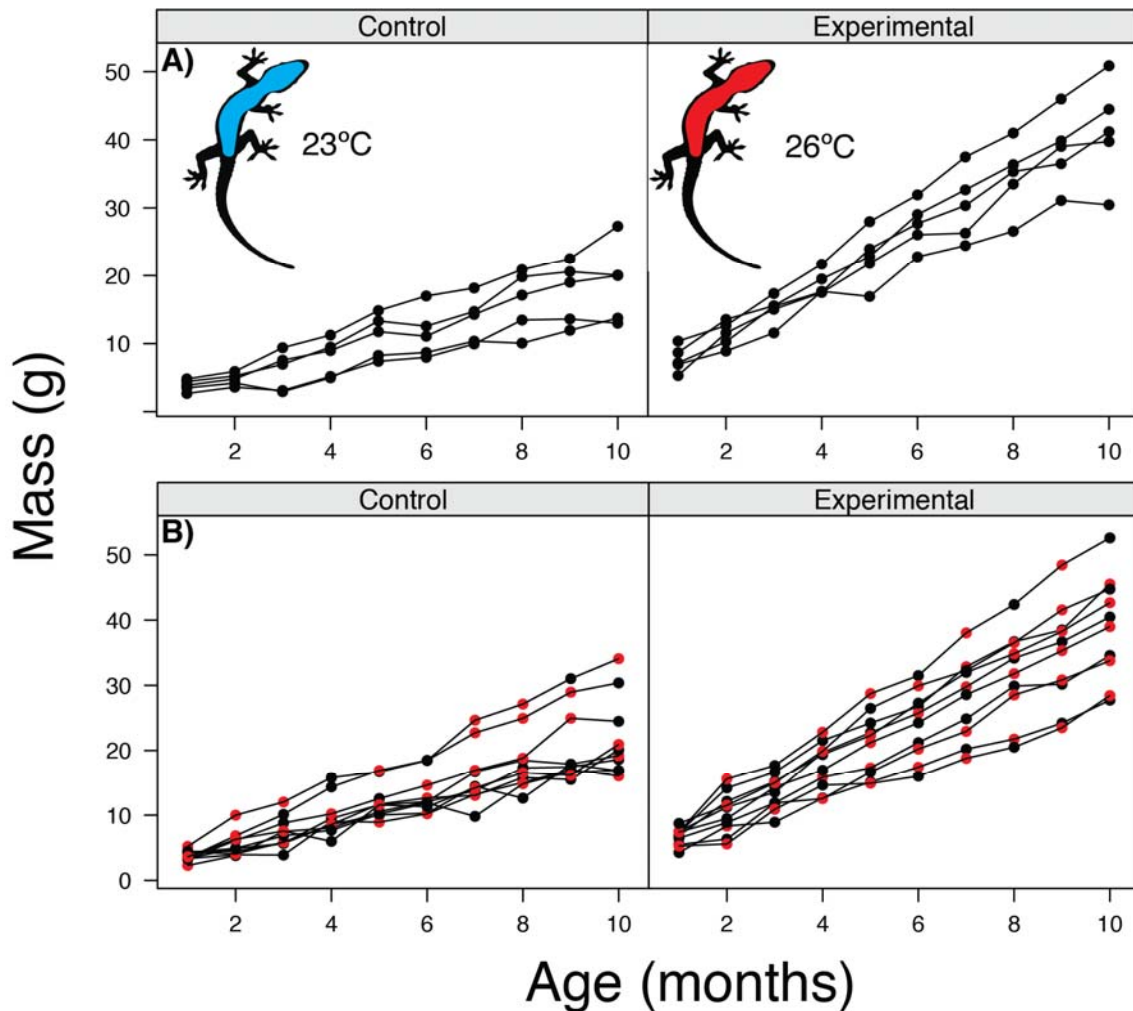

**Figure 3** – Example of experimental data on growth rates across age for two simulated scenarios. A) Mass of  $n = 10$  lizards for a control group incubated at  $23^{\circ}\text{C}$  and experimental group incubated at  $26^{\circ}\text{C}$ . In this scenario, each animal was measured 10 times across the first 10 months of age. B) Mass of  $n = 20$  lizards for a control group  $23^{\circ}\text{C}$  and experimental group incubated at  $26^{\circ}\text{C}$  was measured five times with 50% of the mass data on each of the 20 animals considered missing ('red' points). In both scenarios, there were main effects of treatment and an interaction between growth across ages and treatment. Individual lizards varied in both their intercept and slope (see text for more details). Data was simulated according to eqn. 2 with the following parameters:  $\beta_0 = 1.2$ ;  $\beta_1 = 2$ ;  $\beta_2 = 1.8$ ;  $\beta_3 = 1.6$ . In scenario B, missing data was imputed using likelihood based approaches in ASReml-R.

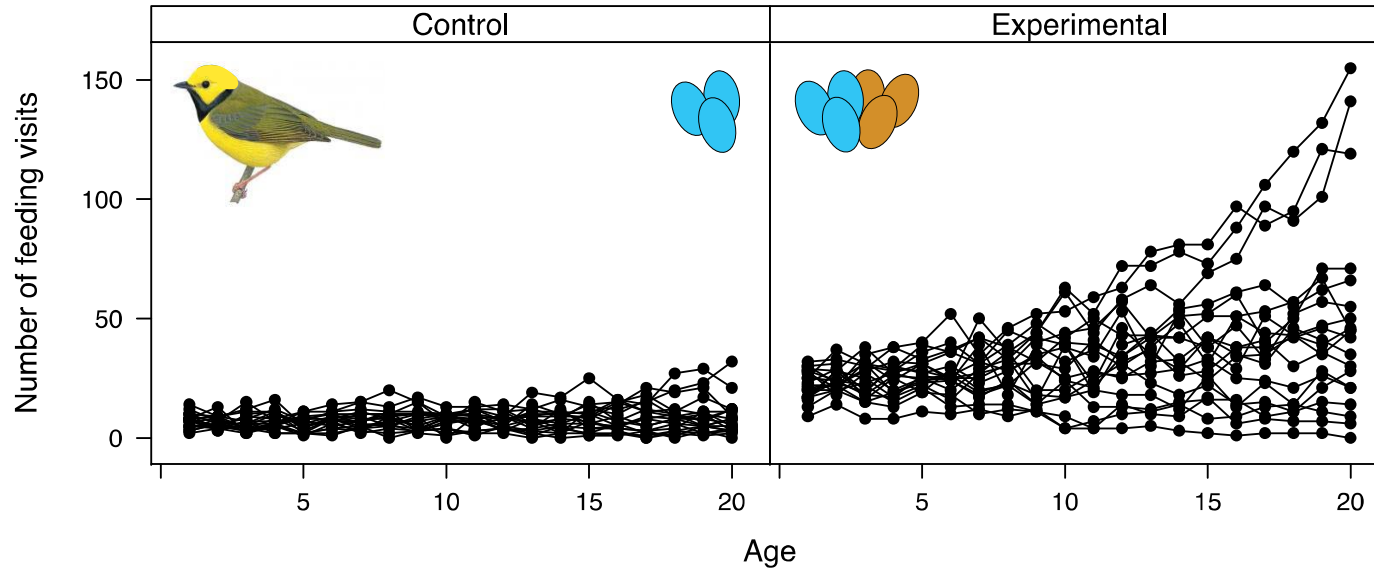

**Figure 4**— Example data showing the provisioning rates (number of feeding visits within a 5-hour period) for control (3 eggs) and experimentally elevated (6 eggs) brood sizes in the fictitious Missing Capped Warbler across the first 20 days of chick age. Provisions were simulated assuming a Poisson error distribution using the following model:  $n_{ij} = (\beta_0 + \alpha_i) + \beta_1 T_{ij} + (\beta_2 + s_j) A_{ij} + \varepsilon_{ij}$  where Provisions =  $\log(n_{ij})$ .  $\beta_0=2$ ;  $\beta_1=1$ ;  $\beta_2=0.01$  with a random intercept and slope variance and covariance matrix as:  $\sim MVN\left(\begin{bmatrix} 0 \\ 0 \end{bmatrix}, \begin{bmatrix} 0.01 & 0 \\ 0 & 0.0025 \end{bmatrix}\right)$ .

### BOX 1

Multiple imputation (MI) for a few different generalised family types can be implemented in the *mice* package (van Buuren & Groothuis-Oudshoorn 2011). Given that our data (number of visits in 5 hours) is Poisson distributed (or nearly so), and hierarchical in nature, we will need to impute using a new add-on developed in the *countimp* package (Kleinke & Reinecke 2013), which imputes Poisson random regressions. It can be installed, along with other needed packages in R as follows:

```
> link <- "http://www.uni-bielefeld.de/soz/kds/software/countimp_1.0.tar.gz"
> install.packages(link, repos=NULL, type="source")
> library(countimp)
> library(mice)
> library(glmmADMB)
```

Our data, including the missing data is set up as follows:

```
> head(data)
  ind age trt trt_name provision
1  1  1  1 Experimental    NA
2  1  2  1 Experimental    22
3  1  3  1 Experimental    29
4  1  4  1 Experimental    38
5  1  5  1 Experimental    33
6  1  6  1 Experimental    37
```

In total, we have approximately 33% missing data at the individual level. To impute these missing data, we need to first set up the predictor matrix to define what variables are class (random effect groups) and what are to be used as random and fixed effects:

```
> data$ind <- as.integer(data$ind) # Need to keep class variable as integer
> imp <- mice(data, maxint = 0, printFlag = FALSE) # Do quick run of mice to set up pred matrix
> pred <- imp$pred # Extract the pred matrix
```

Now that we have the predictor matrix, to run a multi-level imputation we need to change the predictor matrix row for provision to define the class variable (i.e., random effect group – set as ‘-2’ – only one level can be included currently), the variable included as both a fixed and random effect (i.e., age – set as ‘2’ because we have a random regression model) and we will set our ‘trt’ as a fixed effect only (i.e., set as ‘1’) as follows:

```
> pred["provision", ] <- c(-2,2,1,0,0)
```

The ‘0’ is used to tell mice not to include these variables as predictors in the imputation. Now that this is set up we can run multiple imputation telling mice that the ‘provision’ variable is a 2-level Poisson variable:

```
> imp <- mice(data, m = 20, meth = c("", "", "", "", "2l.poisson"), pred = pred)
```

This will impute missing information in the ‘provision’ variable creating  $m = 20$  ‘filled in’ datasets for which estimates and standard errors can be pooled as follows:

```
> fit <- do.mira(imp = imp, DV = "provision", fixedeff = "trt+age", randeff = "1 + age",
  grp = "ind", id = "ind", fam = "poisson")
> summary(fit)
```

We can compare the overall pooled estimates with estimates from our ‘real complete dataset’ (assuming we watched all videos):

| Full Dataset          |          |      | Imputed Dataset              |      |
|-----------------------|----------|------|------------------------------|------|
| <i>Fixed Effects</i>  |          |      | <i>Pooled Fixed Effects</i>  |      |
|                       | Estimate | SE   | Estimate                     | SE   |
| Intercept             | 1.93     | 0.05 | 1.93                         | 0.06 |
| trt                   | 1.13     | 0.06 | 1.13                         | 0.07 |
| age                   | 0.01     | 0.01 | 0.01                         | 0.01 |
| <i>Random Effects</i> |          |      | <i>Pooled Random Effects</i> |      |
|                       | Estimate |      | Estimate                     |      |
| Intercept             | 0.011    |      | 0.015                        |      |
| Age                   | 0.0025   |      | 0.0023                       |      |
